# Supplementary material for: Genome-wide analysis of the ATP-binding cassette (ABC) transporter gene family in sea lamprey and Japanese lamprey
Source: PubMed Central journal article supplement (PMC4458048; doi:10.1186/s12864-015-1677-z), 2015-06-06

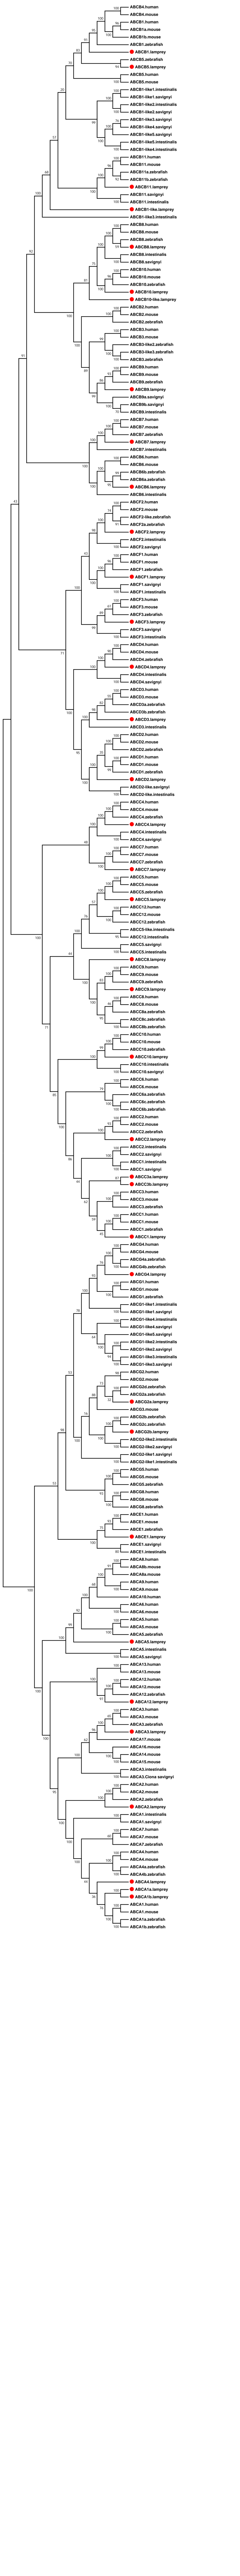

Supplement: 12864_2015_1677_MOESM4_ESM.pdf [file 12864_2015_1677_MOESM4_ESM.pdf]
