# Supplementary material for: Genome-wide analysis of the ATP-binding cassette (ABC) transporter gene family in sea lamprey and Japanese lamprey
Source: PubMed Central journal article supplement (PMC4458048; doi:10.1186/s12864-015-1677-z), 2015-06-06
Supplement: 12864_2015_1677_MOESM5_ESM.pdf [file 12864_2015_1677_MOESM5_ESM.pdf]

**ABCA subfamily:**

**ABCA1a**

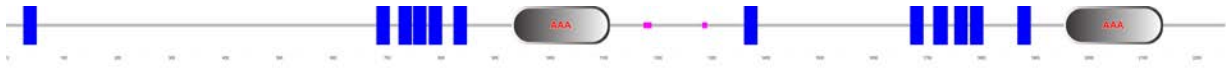

**ABCA1b**

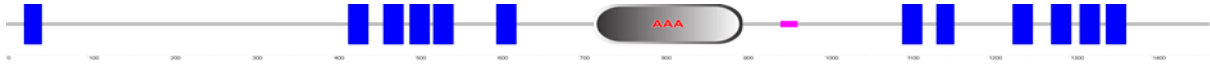

**ABCA2**

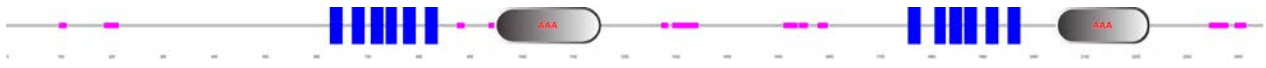

**ABCA3**

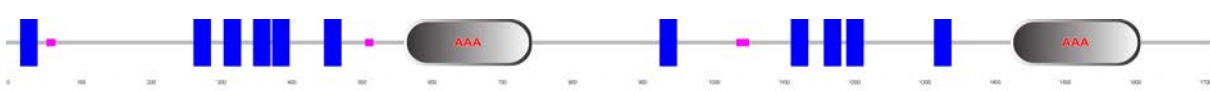

**ABCA4**

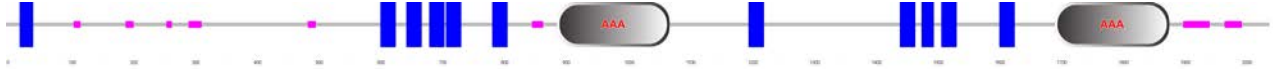

**ABCA5**

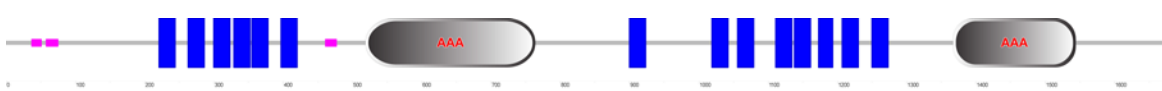

**ABCA12**

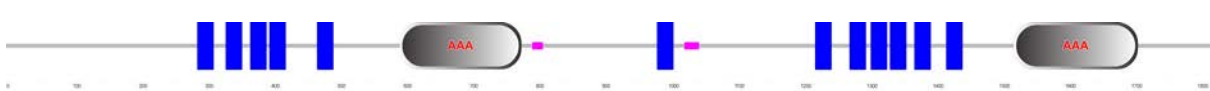

**ABCB subfamily:**

**ABCB1**

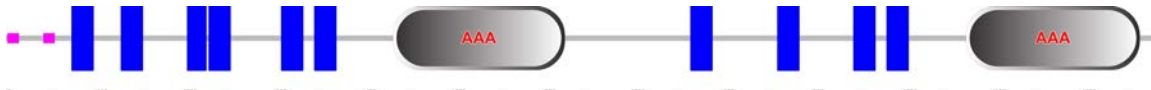

**ABCB1-like**

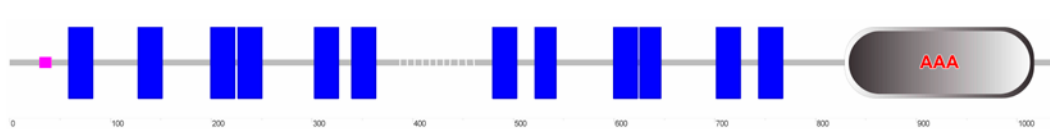

**ABCB5**

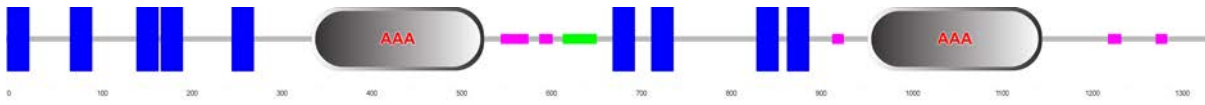

**ABCB6**

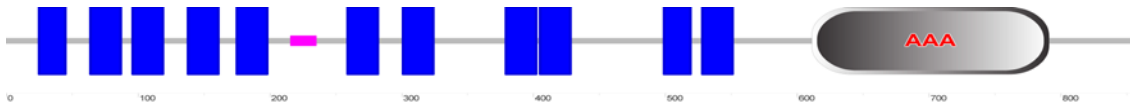

**ABCB7**

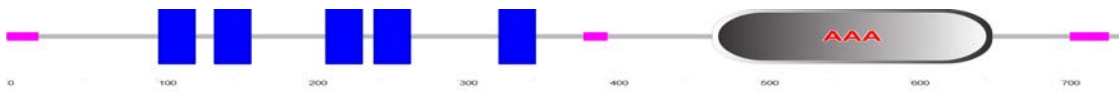

**ABCB8**

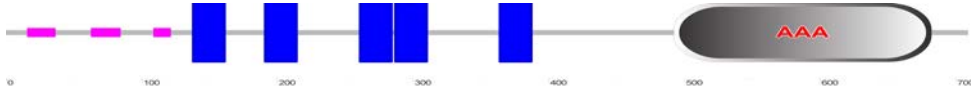

**ABCB9**

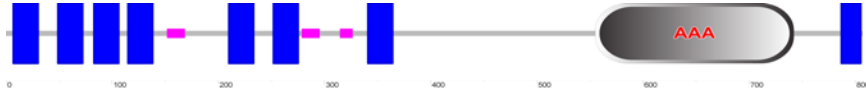

**ABCB10**

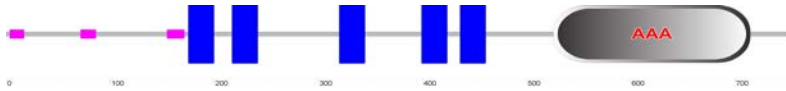

**ABCB10-like**

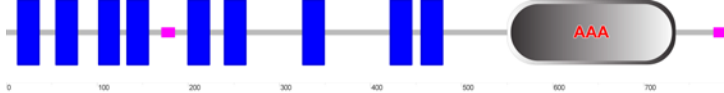

**ABCB11**

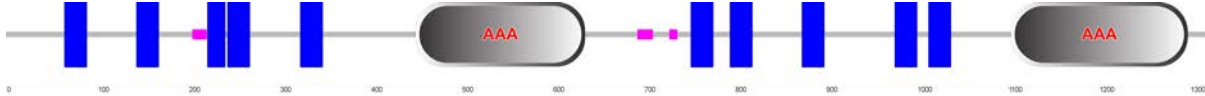

## ABCC subfamily:

### ABCC1

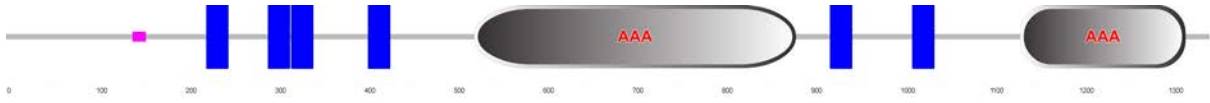

### ABCC2

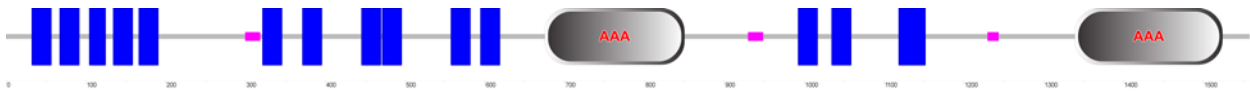

### ABCC3a

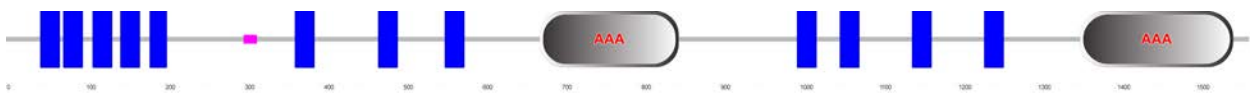

### ABCC3b

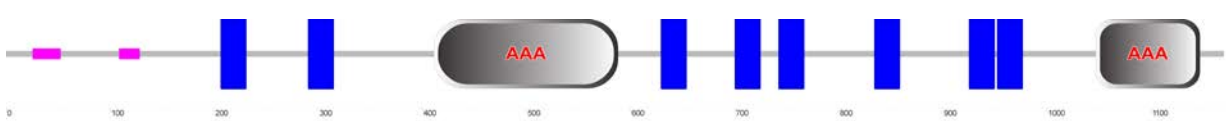

### ABCC4

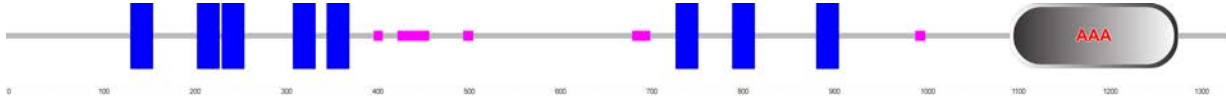

### ABCC5

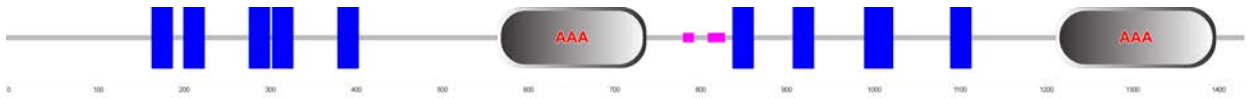

### ABCC7

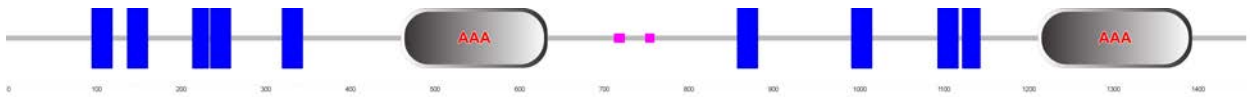

### ABCC8

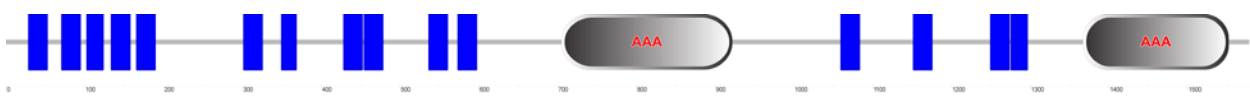

### ABCC9

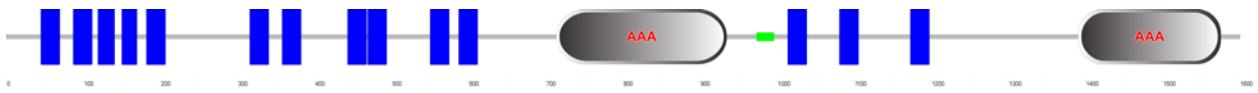

### ABCC10

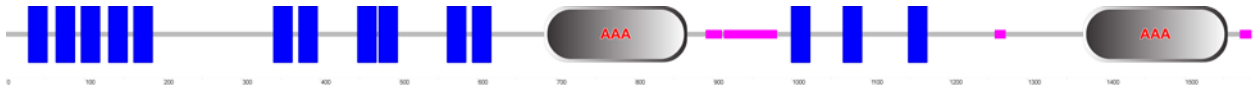

### ABCD subfamily:

#### ABCD2

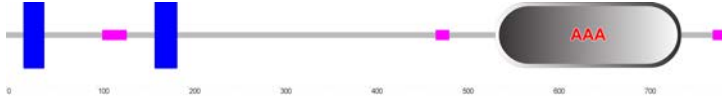

#### ABCD3

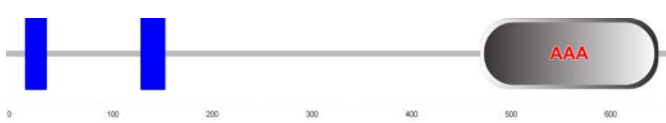

#### ABCD4

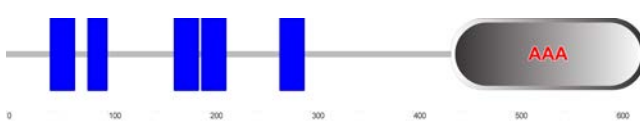

**ABCE subfamily:**

**ABCE1**

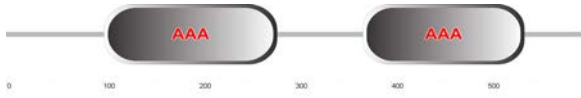

**ABCF subfamily:**

**ABCE1**

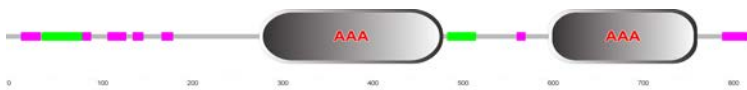

**ABCF2**

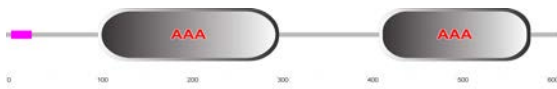

**ABCF3**

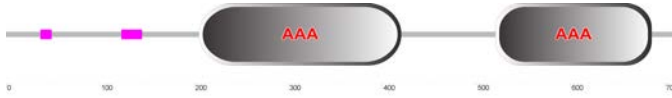

**ABCG subfamily:**

**ABCG2a**

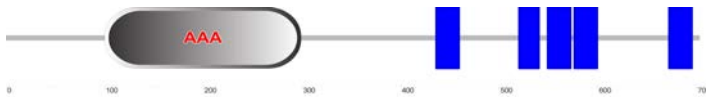

**ABCG2b**

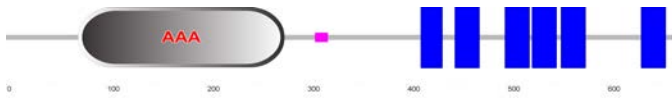

**ABCG4**

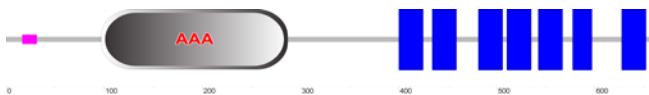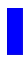

**Transmembrane Domain**

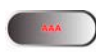

**Nucleotide Binding Domain**
